# Supplementary material
Source: publisher figshare collection journal article supplement (https://asha.figshare.com/articles/dataset/_/28629023)
Supplement: Supplementary file 1 [file 1]

**Supplemental Material S4.** Interobserver agreement (IOA) percentages (occurrence) by participant and variable.

|                            | <b>Hector</b> |            |            | <b>Mateo</b> |            |            | <b>Total</b> |
|----------------------------|---------------|------------|------------|--------------|------------|------------|--------------|
|                            | <i>M</i>      | <b>Min</b> | <b>Max</b> | <i>M</i>     | <b>Min</b> | <b>Max</b> | <i>M</i>     |
| Peer A interactions        | 81.1%         | 33.0%      | 100.0%     | 82.0%        | 33.0%      | 100.0%     | 80.2%        |
| Peer B interactions        | 79.9%         | 50.0%      | 100.0%     | 89.4%        | 80.0%      | 100.0%     | 84.5%        |
| Focus student interactions | 80.8%         | 0.0%       | 100.0%     | 79.9%        | 0.0%       | 100.0%     | 80.4%        |
| Peer interaction type      | 91.0%         | 67.0%      | 100.0%     | 90.3%        | 79.0%      | 100.0%     | 91.0%        |
| Peer mode                  | 97.2%         | 84.0%      | 100.0%     | 99.4%        | 92.0%      | 100.0%     | 98.2%        |
| Focus student mode         | 90.1%         | 50.0%      | 100.0%     | 84.7%        | 50.0%      | 100.0%     | 88.0%        |
| Focus response/initiation  | 83.6%         | 0.0%       | 100.0%     | 90.6%        | 50.0%      | 100.0%     | 88.0%        |

*Note.* The reported min and max are the lowest and highest IOA percentage across all individual sessions. Low session IOA occurred when the behavior of interest occurred infrequently (e.g., if only one occurrence of the behavior occurred, session IOA could only be 0% or 100% and would be 0% if one coder coded the behavior and the other coder did not).
