# Supplementary material
Source: publisher figshare collection journal article supplement (https://asha.figshare.com/articles/dataset/_/28629023)
Supplement: Supplementary file 2 [file 1]

## Supplemental Material S2. Sample play menu.

See the toys below. Circle all the toys you would have fun playing with during the Peer Network.

Anything else you would want to play with?

---

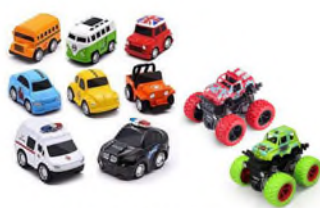

Cars and monster trucks

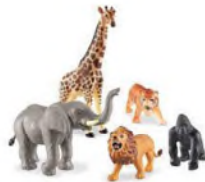

Animals

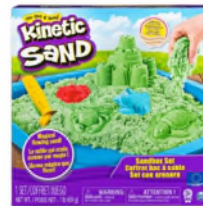

Kinetic sand

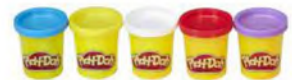

Playdough

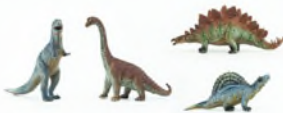

Dinosaurs

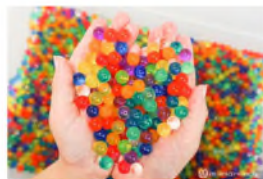

Water beads

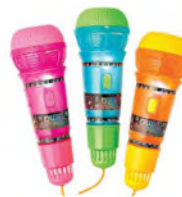

Microphones

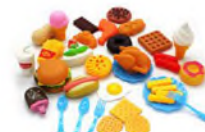

Play food

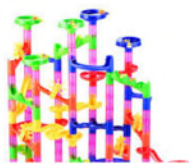

Marble tracks

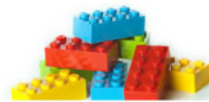

Legos

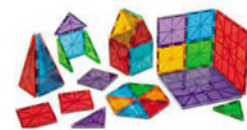

Magnet tiles
