# Supplementary material
Source: publisher figshare collection journal article supplement (https://asha.figshare.com/articles/dataset/_/28629023)
Supplement: Supplementary file 4 [file 1]

**Supplemental Material S5.** Social validity ratings from peers, using 4-point rating scales specific to each question.

| Questions asked to peers                                                                                   | Hector |        | Mateo  |        | <i>M<sup>e</sup></i> |
|------------------------------------------------------------------------------------------------------------|--------|--------|--------|--------|----------------------|
|                                                                                                            | Peer A | Peer B | Peer A | Peer B |                      |
| Do you like playing with [name of focus student] and [name of peer]? <sup>a</sup>                          | 4      | 4      | 3      | 3      | 3.5                  |
| Did you like the lessons where you read the books and talked about them? <sup>a</sup>                      | 3      | 3      | 4      | 4      | 3.5                  |
| How much do you think you learned from the lessons when you read books and talked about them? <sup>b</sup> | 4      | 4      | 3      | 3      | 3.5                  |
| Did you like learning how to use the "Ways to talk and Play" <sup>a</sup>                                  | 4      | 4      | 4      | 4      | 4.0                  |
| What is it like to use the "Ways to talk and play" now? <sup>c</sup>                                       | 3      | 4      | 3      | 4      | 3.5                  |
| Do you like using the communication device when you talk and play? <sup>a</sup>                            | 3      | 4      | 4      | 2      | 3.3                  |
| What is it like to use the communication device now? <sup>c</sup>                                          | 3      | 4      | 3      | 3      | 3.3                  |
| How much do you like playing with [name of peer] now? <sup>d</sup>                                         | 2      | 4      | 3      | 4      | 3.3                  |
| How much do you like playing with [name focus student] now? <sup>d</sup>                                   | 4      | 3      | 4      | 4      | 3.8                  |
| How well do you think you all play together? <sup>d</sup>                                                  | 4      | 3      | 4      | 3      | 3.5                  |
| Do you think that other kids would like playing together like this? <sup>a</sup>                           | 3      | 3      | 3      | 4      | 3.3                  |

<sup>a</sup> 1 = not really, 2 = a little, 3 = like it, 4 = like it a lot.

<sup>b</sup> 1 = nothing, 2 = only a little, 3 = I learned some, 4 = I learned a lot.

<sup>c</sup> 1 = very hard, 2 = kind of hard, 3 = kind of easy, 4 = easy.

<sup>d</sup> 1 = less than I did before, 2 = about the same amount as I did before, 3 = more than I did before, 4 = a lot more than I did before.
