# Supplementary material
Source: publisher figshare collection journal article supplement (https://asha.figshare.com/articles/dataset/_/28629023)
Supplement: Supplementary file 5 [file 1]

**Supplemental Material S3.** Books, lesson objectives, and lesson lengths for the social–emotional lessons during baseline.

| <b>Participant/<br/>session</b> | <b>Book</b>                | <b>Author</b> | <b>Objective</b>                                                                                                                                       | <b>Lesson length</b> |
|---------------------------------|----------------------------|---------------|--------------------------------------------------------------------------------------------------------------------------------------------------------|----------------------|
| Hector                          |                            |               |                                                                                                                                                        |                      |
| Session 1                       | A Little Spot of Belonging | Diane Alber   | Students will be able to talk about belonging in their own words.                                                                                      | 15 min               |
| Session 2                       | Can I Play Too?            | Mo Willems    | Students will be able to talk about how to include others when playing.                                                                                | 12 min               |
| Session 3                       | When Charly Met Emma       | Amy Webb      | Students will be able to (a) make meaning of disability as an aspect of diversity and (b) celebrate the similarities and differences of their friends. | 18 min               |
| Mateo                           |                            |               |                                                                                                                                                        |                      |
| Session 1                       | Our Class is a Family      | Shannon Olsen | Students will be able to talk about how treating others like a family supports inclusion.                                                              | 11 min               |
| Session 2                       | Can I Play Too?            | Mo Willems    | Students will be able to talk about how to include others when playing.                                                                                | 9 min                |
| Session 3                       | When Charly Met Emma       | Amy Webb      | Students will be able to (a) make meaning of disability as an aspect of diversity and (b) celebrate the similarities and differences of their friends. | 12 min               |
