# Supplementary material
Source: publisher figshare collection journal article supplement (https://asha.figshare.com/articles/dataset/_/28629023)
Supplement: Supplementary file 6 [file 1]

**Supplemental Material S6.** Educator social validity ratings for the goals of the intervention ( $n = 5$  educators).

| <b>Survey item</b>                                                                                          | <b><i>M</i></b> | <b><i>SD</i></b> |
|-------------------------------------------------------------------------------------------------------------|-----------------|------------------|
| Promoting positive peer relationships among students with and without disabilities                          | 5.0             | —                |
| Teaching students without disabilities positive ways to interact and play with classmates with disabilities | 5.0             | —                |
| Teaching students with and without disabilities about acceptance, friendship, inclusion, and belonging      | 4.8             | 0.4              |
| Promoting engagement between students with and without disabilities through shared activities               | 4.8             | 0.4              |
| Promoting positive communication and interaction among students with and without disabilities               | 4.8             | 0.4              |
| Supporting the social skills of students with autism who have limited speech                                | 4.8             | 0.4              |
| Supporting the communication skills of students with autism who have limited speech                         | 4.6             | 0.5              |
| Supporting the play skills of students with autism who have limited speech                                  | 4.6             | 0.5              |
| Teaching students with and without disabilities about neurodiversity and disability                         | 4.2             | 0.4              |

*Note.* The survey item was worded "How important do you believe that each of the following should be for educators working in schools (e.g., general and special educators, speech-language pathologists, paraprofessionals, other school staff?" Educators responded on a 5-point scale from 1 = not at all important to 5 = extremely important.
